# Supplementary material for: Impact of Insulin Tregopil and Its Permeation Enhancer on Pharmacokinetics of Metformin in Healthy Volunteers: Randomized, Open‐Label, Placebo‐Controlled, Crossover Study
Source: PubMed Central journal article supplement — Clin Transl Sci. 2019 Feb 12;12(3):276–82. doi: 10.1111/cts.12609 (PMC6510383; doi:10.1111/cts.12609), 2019-02-12
Supplement: CTS-12-276-s001.pdf [file CTS-12-276-s001.pdf]

**Table S1: Summary of demographics by treatment sequence**

| Parameters                    | Statistics   | Cohort 1       |                 |                |                |                 |                | Cohort 2       |                 |                |
|-------------------------------|--------------|----------------|-----------------|----------------|----------------|-----------------|----------------|----------------|-----------------|----------------|
|                               |              | DABC           | DACB            | DBAC           | DBCA           | DCAB            | Total          | EF             | FE              | Total          |
| N                             |              | 4              | 4               | 4              | 4              | 4               | 24             | 12             | 12              | 24             |
| <b>Gender</b>                 | Female n (%) | 3(75.00)       | 3(75.00)        | 2(50.00)       | 2(50.00)       | 2(50.00)        | 12(50.00)      | 6(50.00)       | 6(50.00)        | 12(50.00)      |
|                               | Male n (%)   | 1(25.00)       | 1(25.00)        | 2(50.00)       | 2(50.00)       | 2(50.00)        | 12(50.00)      | 6(50.00)       | 6(50.00)        | 12(50.00)      |
| <b>Age (Years)</b>            | Mean(±SD)    | 42.50(± 9.04)  | 48.50(± 4.43)   | 44.00(± 5.35)  | 33.25(± 10.31) | 43.25(± 13.60)  | 41.25(± 10.02) | 37.33(± 9.21)  | 36.58(± 11.69)  | 36.96(± 10.30) |
|                               | Median       | 43.00          | 49.00           | 43.50          | 30.50          | 49.00           | 43.50          | 37.50          | 35.50           | 37.50          |
|                               | Min, Max     | 31.00, 53.00   | 43.00, 53.00    | 39.00, 50.00   | 24.00, 48.00   | 23.00, 52.00    | 23.00, 53.00   | 25.00, 53.00   | 24.00, 51.00    | 24.00, 53.00   |
| <b>BMI (Kg/M<sup>2</sup>)</b> | Mean(±SD)    | 28.40(± 2.62)  | 29.53(± 1.79)   | 27.83(± 3.88)  | 28.43(± 3.08)  | 27.83(± 1.34)   | 28.93(± 2.77)  | 27.81(± 4.23)  | 26.73(± 3.54)   | 27.27(± 3.85)  |
|                               | Median       | 29.30          | 29.30           | 26.80          | 28.95          | 27.55           | 28.50          | 27.80          | 26.55           | 27.05          |
|                               | Min, Max     | 24.70, 30.30   | 27.70, 31.80    | 24.40, 33.30   | 24.50, 31.30   | 26.60, 29.60    | 24.40, 34.90   | 21.50, 34.00   | 20.60, 31.90    | 20.60, 34.00   |
| <b>Height (Cm)</b>            | Mean(±SD)    | 160.78(± 4.90) | 162.88(± 12.40) | 166.40(± 9.61) | 169.75(± 5.32) | 159.00(± 10.10) | 164.06(± 9.04) | 165.97(± 8.64) | 164.56(± 10.19) | 165.26(± 9.27) |
|                               | Median       | 160.00         | 163.75          | 168.25         | 170.00         | 158.50          | 164.25         | 163.50         | 165.00          | 163.50         |
|                               | Min, Max     | 156.00, 167.10 | 149.00, 175.00  | 154.10, 175.00 | 163.00, 176.00 | 149.00, 170.00  | 149.00, 181.20 | 152.40, 183.00 | 149.00, 178.00  | 149.00, 183.00 |
| <b>Weight (Kg)</b>            | Mean(±SD)    | 73.50(± 8.55)  | 79.13(± 16.56)  | 77.10(± 12.20) | 81.85(± 9.66)  | 70.32(± 5.92)   | 78.05(± 10.97) | 77.09(± 16.04) | 72.11(± 9.42)   | 74.60(± 13.11) |
|                               | Median       | 72.35          | 78.85           | 78.80          | 81.25          | 69.70           | 77.35          | 76.75          | 75.40           | 76.05          |
|                               | Min, Max     | 64.80, 84.50   | 61.40, 97.40    | 61.80, 89.00   | 70.80, 94.10   | 64.90, 77.00    | 61.40, 97.40   | 52.40, 113.00  | 57.80, 83.60    | 52.40, 113.00  |

Treatment A – metformin (2 g) was administered with breakfast 20 min after one insulin tregopil (10 mg) tablet Treatment B – metformin (2 g) was administered with breakfast 20 min after 1 placebo tablet

Treatment C – metformin (2 g) was administered with breakfast 20 min after 3 placebo tablets

Treatment D – metformin (2 g) was administered with breakfast

Treatment E – metformin (2 g) was administered in fasting condition 20 min before breakfast

Treatment F – 3 placebo tablets and metformin (2 g) were administered in fasting condition 20 min before breakfast.
