# Supplementary material for: Impact of Insulin Tregopil and Its Permeation Enhancer on Pharmacokinetics of Metformin in Healthy Volunteers: Randomized, Open‐Label, Placebo‐Controlled, Crossover Study
Source: PubMed Central journal article supplement — Clin Transl Sci. 2019 Feb 12;12(3):276–82. doi: 10.1111/cts.12609 (PMC6510383; doi:10.1111/cts.12609), 2019-02-12
Supplement: CTS-12-276-s002.pdf [file CTS-12-276-s002.pdf]

**Table S1: Summary of Pharmacokinetic parameters (treatment-wise)**

| PK Parameters                          | Statistics | Cohort 1         |                  |                  |                  |                  | Cohort 2         |                  |                  |
|----------------------------------------|------------|------------------|------------------|------------------|------------------|------------------|------------------|------------------|------------------|
|                                        |            | Treatment A      | Treatment B      | Treatment C      | Treatment D      | Total            | Treatment E      | Treatment F      | Total            |
|                                        | N          | 24               | 24               | 24               | 24               | 96               | 24               | 23               | 47               |
| <b>AUC<sub>inf_obs</sub> (h.ng/mL)</b> | Mean(±SD)  | 16558(± 3026.8)  | 17447(± 4658.6)  | 17664(± 3447.7)  | 17205(± 3285.0)  | 17218(± 3624.4)  | 14589(± 2835.9)  | 15866(± 4353.0)  | 15214(± 3674.2)  |
|                                        | Median     | 16809            | 16028            | 17042            | 16777            | 16787            | 14704            | 16240            | 15070            |
|                                        | CV%        | 18.28%           | 26.70%           | 19.52%           | 19.09%           | 21.05%           | 19.44%           | 27.44%           | 24.15%           |
| <b>AUC<sub>last</sub> (h.ng/mL)</b>    | Mean(±SD)  | 15965(± 3025.0)  | 16936(± 4534.3)  | 17099(± 3451.0)  | 16704(± 3299.6)  | 16676(± 3592.0)  | 14177(± 2780.1)  | 15498(± 4243.1)  | 14823(± 3594.5)  |
|                                        | Median     | 16401            | 15670            | 16570            | 16436            | 16261            | 14244            | 15883            | 14741            |
|                                        | CV%        | 18.95%           | 26.77%           | 20.18%           | 19.75%           | 21.54%           | 19.61%           | 27.38%           | 24.25%           |
| <b>C<sub>max</sub> (ng/mL)</b>         | Mean(±SD)  | 2422.5(± 560.78) | 2466.3(± 480.60) | 2584.6(± 496.66) | 2615.4(± 488.17) | 2522.2(± 505.92) | 2496.3(± 549.99) | 2924.3(± 945.08) | 2705.7(± 790.70) |
|                                        | Median     | 2410.0           | 2370.0           | 2530.0           | 2555.0           | 2485.0           | 2480.0           | 2890.0           | 2730.0           |
|                                        | CV%        | 23.15%           | 19.49%           | 19.22%           | 18.67%           | 20.06%           | 22.03%           | 32.32%           | 29.22%           |
| <b>t<sub>½</sub> (h)</b>               | Mean(±SD)  | 5.39(± 1.66)     | 4.67(± 1.58)     | 5.10(± 1.89)     | 4.96(± 1.79)     | 5.03(± 1.73)     | 4.89(± 1.94)     | 4.48(± 1.16)     | 4.69(± 1.60)     |
|                                        | Median     | 4.90             | 4.21             | 4.69             | 4.34             | 4.69             | 4.03             | 4.06             | 4.06             |
|                                        | CV%        | 30.78%           | 33.80%           | 37.11%           | 36.10%           | 34.32%           | 39.66%           | 25.96%           | 34.19%           |
| <b>λ<sub>z</sub> (1/h)</b>             | Mean(±SD)  | 0.14(± 0.04)     | 0.16(± 0.06)     | 0.15(± 0.05)     | 0.15(± 0.04)     | 0.16(± 0.05)     | 0.16(± 0.05)     | 0.16(± 0.04)     | 0.16(± 0.04)     |
|                                        | Median     | 0.14             | 0.16             | 0.15             | 0.16             | 0.15             | 0.17             | 0.17             | 0.17             |
|                                        | CV%        | 28.57%           | 33.54%           | 30.09%           | 29.21%           | 30.74%           | 30.79%           | 24.71%           | 27.63%           |

Treatment A – metformin (2 g) was administered with breakfast 20 min after one insulin tregopil (10 mg) tablet Treatment B – metformin (2 g) was administered with breakfast 20 min after 1 placebo tablet

Treatment C – metformin (2 g) was administered with breakfast 20 min after 3 placebo tablets

Treatment D – metformin (2 g) was administered with breakfast

Treatment E – metformin (2 g) was administered in fasting condition 20 min before breakfast

Treatment F – 3 placebo tablets and metformin (2 g) were administered in fasting condition 20 min before breakfast.
