# Supplementary material for: Impact of Insulin Tregopil and Its Permeation Enhancer on Pharmacokinetics of Metformin in Healthy Volunteers: Randomized, Open‐Label, Placebo‐Controlled, Crossover Study
Source: PubMed Central journal article supplement — Clin Transl Sci. 2019 Feb 12;12(3):276–82. doi: 10.1111/cts.12609 (PMC6510383; doi:10.1111/cts.12609), 2019-02-12
Supplement: CTS-12-276-s003.pdf [file CTS-12-276-s003.pdf]

**Table S1: Summary of pharmacokinetic parameters (period-wise)**

| PK Parameters                          | Statistics | Cohort 1         |                  |                  |                  |                  | Cohort 2         |                  |                  |
|----------------------------------------|------------|------------------|------------------|------------------|------------------|------------------|------------------|------------------|------------------|
|                                        |            | Period 1         | Period 2         | Period 3         | Period 4         | Total            | Period 1         | Period 2         | Total            |
|                                        | N          | 24               | 24               | 24               | 24               | 96               | 24               | 23               | 47               |
| <b>AUC<sub>INF_obs</sub> (h.ng/mL)</b> | Mean(±SD)  | 17205(± 3285.0)  | 17134(± 3967.2)  | 16254(± 3643.1)  | 18281(± 3507.2)  | 17218(± 3624.4)  | 14983(± 3950.9)  | 15454(± 3433.4)  | 15214(± 3674.2)  |
|                                        | Median     | 16777            | 16417            | 15303            | 17799            | 16787            | 14654            | 16240            | 15070            |
|                                        | CV%        | 19.09%           | 23.15%           | 22.41%           | 19.19%           | 21.05%           | 26.37%           | 22.22%           | 24.15%           |
| <b>AUC<sub>last</sub> (h.ng/mL)</b>    | Mean(±SD)  | 16704(± 3299.6)  | 16518(± 3823.5)  | 15693(± 3628.8)  | 17789(± 3505.8)  | 16676(± 3592.0)  | 14636(± 3824.1)  | 15018(± 3413.2)  | 14823(± 3594.5)  |
|                                        | Median     | 16436            | 15565            | 14871            | 17335            | 16261            | 14345            | 15721            | 14741            |
|                                        | CV%        | 19.75%           | 23.15%           | 23.12%           | 19.71%           | 21.54%           | 26.13%           | 22.73%           | 24.25%           |
| <b>C<sub>max</sub> (ng/mL)</b>         | Mean(±SD)  | 2615.4(± 488.17) | 2557.1(± 586.33) | 2354.2(± 510.51) | 2562.1(± 415.96) | 2522.2(± 505.92) | 2707.9(± 691.29) | 2703.5(± 898.69) | 2705.7(± 790.70) |
|                                        | Median     | 2555.0           | 2410.0           | 2360.0           | 2545.0           | 2485.0           | 2775.0           | 2640.0           | 2730.0           |
|                                        | CV%        | 18.67%           | 22.93%           | 21.69%           | 16.24%           | 20.06%           | 25.53%           | 33.24%           | 29.22%           |
| <b>t<sub>1/2</sub> (h)</b>             | Mean(±SD)  | 4.96(± 1.79)     | 5.50(± 2.03)     | 5.21(± 1.83)     | 4.45(± 1.00)     | 5.03(± 1.73)     | 4.36(± 1.49)     | 5.04(± 1.68)     | 4.69(± 1.60)     |
|                                        | Median     | 4.34             | 4.83             | 4.69             | 4.47             | 4.69             | 3.88             | 4.24             | 4.06             |
|                                        | CV%        | 36.10%           | 36.80%           | 35.20%           | 22.58%           | 34.32%           | 34.20%           | 33.24%           | 34.19%           |
| <b>λ<sub>z</sub> (1/h)</b>             | Mean(±SD)  | 0.15(± 0.04)     | 0.14(± 0.05)     | 0.15(± 0.05)     | 0.17(± 0.04)     | 0.15(± 0.05)     | 0.17(± 0.05)     | 0.15(± 0.04)     | 0.16(± 0.04)     |
|                                        | Median     | 0.16             | 0.14             | 0.15             | 0.16             | 0.15             | 0.18             | 0.16             | 0.17             |
|                                        | CV%        | 29.21%           | 34.85%           | 32.07%           | 27.19%           | 30.74%           | 27.41%           | 25.99%           | 27.63%           |
